# Supplementary material for: Tumoral PD-L1 expression defines a subgroup of poor-prognosis vulvar carcinomas with non-viral etiology
Source: PubMed Central journal article supplement (PMC5696230; doi:10.18632/oncotarget.21641), 2017-10-06
Supplement: oncotarget-08-92890-s001.pdf [file oncotarget-08-92890-s001.pdf]

## Tumoral PD-L1 expression defines a subgroup of poor-prognosis vulvar carcinomas with non-viral etiology

### SUPPLEMENTARY MATERIALS

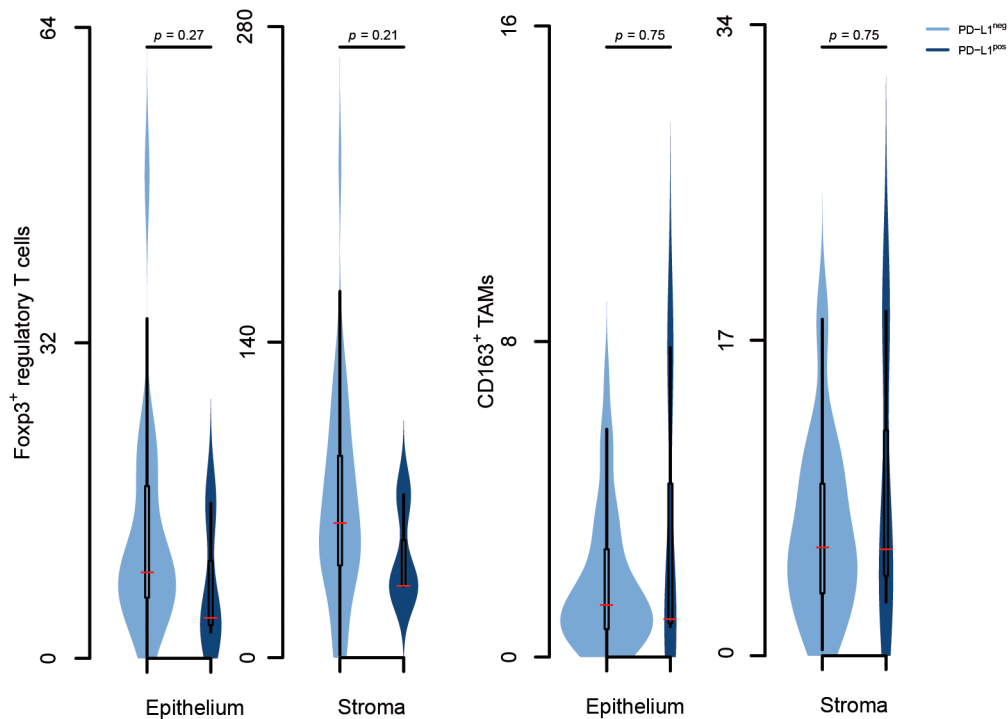

**Supplementary Figure 1: Immunosuppressive cell populations are not associated with PD-L1 expression.** Expression of PD-L1 was determined by immunohistochemistry; immunosuppressive cell populations were determined in the tumor (epithelial) and the peri-tumoral micromilieu (stroma) using immunohistochemistry; samples were divided into absent and present PD-L1 expression groups; values depict the mean percentage of numbers (Foxp3<sup>+</sup> T<sub>reg</sub> cells) and immunoreactivity (CD163<sup>+</sup> TAMs), respectively, per tissue compartment (tumor or stroma); violin plots depict the distribution of data points; the median, 25<sup>th</sup> and 75<sup>th</sup> percentiles and whiskers are shown.

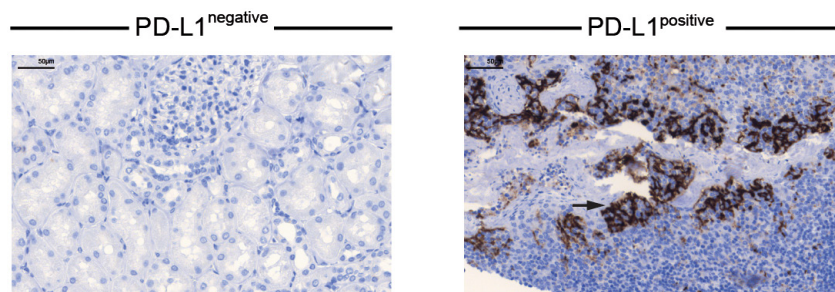

**Supplementary Figure 2: PD-L1 staining controls.** Representative images depict expression of membranous PD-L1 in kidney tissue (negative control) and tonsil tissue (positive control, brown cell membrane, arrow) visualized by immunohistochemistry; hematoxylin (blue) was used for nuclear staining (bright field image, 300× magnification).

**Supplementary Table 1: Summary of staining of immunosuppressive cell populations**

| <b>Variable</b>                            |            | <b>Value [mean <math>\pm</math> SD (range)]</b> |
|--------------------------------------------|------------|-------------------------------------------------|
| Foxp3 <sup>+</sup> regulatory T cells (n)  | Epithelium | 11.99 $\pm$ 10.47 (0 - 50.83)                   |
|                                            | Stroma     | 65.32 $\pm$ 42.42 (1.3 - 219.44)                |
| CD163 <sup>+</sup> TAMs (immunoreactivity) | Epithelium | 1.98 $\pm$ 1.90 (0 - 7.85)                      |
|                                            | Stroma     | 7.01 $\pm$ 4.94 (0.33 - 19.29)                  |

SD, standard deviation; TAMs, tumor-associated macrophages.
